# Supplementary material
Source: PubMed Central journal article supplement (PMC187884)
Supplement: pnas_100_17_9912__1.pdf [file pnas_100_17_9912__1.pdf]

**Table 2. Candidate nZUR-binding sites in proteobacteria and pZUR-binding sites in the *Bacillus* group**

| Genome                                                                 | Genes and operons                                                                        | Site or consensus               | Score | Position |
|------------------------------------------------------------------------|------------------------------------------------------------------------------------------|---------------------------------|-------|----------|
| <b><math>\gamma</math>-Proteobacteria</b>                              |                                                                                          | <b>GAAATGTTATANTATAACATTTTC</b> |       |          |
| EC                                                                     | <u><i>znuA</i> &lt;&gt; <i>znuC-znuB</i> *</u>                                           | <u>GAAATGTTATAATATcACAcTTC</u>  | 7.04  | +3       |
|                                                                        | <i>zinT</i> ( <i>b1973</i> )                                                             | tAtATGTTAcAAATAACATTaC          | 5.89  | -57      |
|                                                                        | <i>L31p</i> ( <i>ykgM</i> )                                                              | GttATGTTATAAcATAACAggTa         | 4.91  | -28      |
| ST                                                                     | <u><i>znuA</i> &lt;&gt; <i>znuC-znuB</i></u>                                             | <u>agAATGTTATAATATcACATTTTC</u> | 7.00  | -36      |
|                                                                        | <i>zinT</i> ( <i>STY1858</i> )                                                           | GcAATGTTATAATATAACAaTca         | 6.11  | -50      |
|                                                                        | <i>L31p</i> ( <i>rpmE2</i> )                                                             | ttAtTGTTATgTTATAACATaat         | 5.00  | -36      |
| KP                                                                     | <u><i>znuA</i> &lt;&gt; <i>znuC-znuB</i></u>                                             | <u>tgAATGTTATAATATcACATcaC</u>  | 6.57  | -35      |
|                                                                        | <i>zinT</i>                                                                              | GAtATGTTATATcgtAACAAaTTt        | 5.05  | -53      |
|                                                                        | <i>znuC2-znuB2</i>                                                                       | ttAtTGTTATgTTATAACATTaa         | 5.49  | -106     |
| YP                                                                     | <u><i>znuA</i> &lt;&gt; <i>znuC-znuB</i></u>                                             | <u>tgAATGTTATAATATtACGcTTt</u>  | 5.59  | -52      |
|                                                                        | <i>L31p-L36p</i> ( <i>YP03134-5</i> )                                                    | atgATGTTAcATTATAACATact         | 5.33  | -37      |
| VC                                                                     | <u><i>znuA</i> &lt;&gt; <i>znuC-znuB</i></u>                                             | <u>GttATGTTATAAagTAACATTca</u>  | 5.30  | -49      |
|                                                                        | <i>L31p-L36p</i> ( <i>VC0878-9</i> )                                                     | aAAATGTTATAAcATAACAaTTt         | 5.83  | -41      |
| <b><math>\alpha</math>-Proteobacteria (<i>Rhodobacter</i> group)</b>   |                                                                                          | <b>GATATGTTATAACATATC</b>       |       |          |
| RC                                                                     | <u><i>znuA</i> &lt;&gt; <i>zur-znuB-znuC</i></u>                                         | <u>GtTATcTcATAACATAgA</u>       | 5.18  | -58      |
| RS                                                                     | <u><i>znuA</i> &lt;&gt; <i>zur-znuB-znuC</i></u>                                         | <u>cATGcGTTATAcCATATC</u>       | 5.35  | +1       |
|                                                                        | <i>yrpE</i>                                                                              | GtTATGaTATAACgTAat              | 4.58  | -48      |
|                                                                        | <i>yrpE</i>                                                                              | <u>GATATGTaATAACATATC</u>       | 6.31  | -45      |
| <b><math>\alpha</math>-Proteobacteria (<i>Agrobacterium</i> group)</b> |                                                                                          | <b>GTAATGTNATNACATTAC</b>       |       |          |
| AT                                                                     | <u><i>yrpE</i> (<i>AGR_C_1935</i>)</u>                                                   | <u>GTAATGTtATtACgTTAC</u>       | 5.80  | -52      |
|                                                                        | <u><i>znuA</i> &lt;&gt; <i>znuC-znuB-zur</i> (<i>AGR_C_2805</i>&lt;&gt;<i>4-2-1</i>)</u> | <u>taAATGTaATaACATaAC</u>       | 5.69  | -37      |
| BM                                                                     | <u><i>znuA</i> &lt;&gt; <i>znuC-znuB-zur</i> (<i>BME110178</i>&lt;&gt;<i>7-5</i>)</u>    | <u>GTAATaaaATaACATatC</u>       | 5.21  | -80      |
| SM                                                                     | <u><i>znuA</i> &lt;&gt; <i>znuC-znuB-zur</i> (<i>SMc04245</i>&lt;&gt;<i>4-2</i>)</u>     | <u>tTgATGTaATaACATaAC</u>       | 5.65  | -87      |
|                                                                        | <i>zinL</i> ( <i>SMc03799</i> )                                                          | <u>GaAATGTaATaACgTatC</u>       | 5.35  | -73      |
| ML                                                                     | <u><i>znuC-znuB-zinA</i> (<i>M118315-3</i>)</u>                                          | <u>cTAATGTaATaACATcAC</u>       | 5.36  | -68      |

Table 2, continued

| Genome                                                | Genes and operons                                  | Site                           | Score | Pos. |
|-------------------------------------------------------|----------------------------------------------------|--------------------------------|-------|------|
| <b>Gram-positive bacteria (<i>Bacillus</i> group)</b> |                                                    | <b>TAAATCGTAATNATTACGATTTA</b> |       |      |
| BS                                                    | <u><i>adcA-adcC-adcB</i></u> ( <i>ycdHlyceA</i> )* | <u>aAAATCGTtATCATTtGATTTt</u>  | 6.05  | -53  |
|                                                       | <u><i>yciC</i></u> *                               | <u>TAAATCGTAATCATTctatTTTA</u> | 6.31  | -38  |
|                                                       | <i>yciA-yciB</i> *                                 | TAAATaGTAATTATTACGATTTg        | 6.75  | -45  |
|                                                       | <i>zinT</i> ( <i>yrpE</i> )                        | TAAATCGTAATGtTTtCGATTTA        | 6.56  | -41  |
|                                                       | <i>S14p</i> ( <i>yhzA</i> )                        | TAAATCGTAAcAATTtCGATTTA        | 6.52  | -41  |
|                                                       | <i>L31p</i> ( <i>ytiA</i> )                        | TAAAaCGTAATTATTACGATTTA        | 7.00  | -38  |
|                                                       | <i>L33p1</i>                                       | TAAAaCGTAATCATTACGtTTTA        | 6.86  | -16  |
| BH                                                    | <u><i>adcA</i></u> (BH2760)                        | <u>cAAATCGTAAcTATTcCGATaTA</u> | 6.27  | -66  |
|                                                       | <u><i>yciC</i></u> (BH1790)                        | <u>cAAAgCGTAATTATTACGATTTA</u> | 6.69  | -196 |
|                                                       | <i>yciA</i> (BH0998)                               | TAAATCGTAATTATTcttATTTA        | 6.53  | -40  |
|                                                       | <i>yciC2</i> (BH0366)                              | TAAATaGgAATTATTACGATTTA        | 6.80  | -41  |
|                                                       | <i>adcC-adcB-zur</i> (BH1396-4)                    | TAAATCGgAATGATTcttAaTat        | 5.11  | -73  |
| BE                                                    | <u><i>adcA</i></u>                                 | <u>cAAATCGTAATGATTACGATaTA</u> | 6.78  | -62  |
|                                                       | <i>adcC-adcB</i>                                   | cAAATCGgAATGATTctGAaTTA        | 5.98  | -40  |
| BA                                                    | <i>adcC-adcB-zur</i>                               | TAAATCGgAATCATTctGAaTTA        | 6.15  | -40  |
|                                                       | <i>yciC</i>                                        | TAAATCGTAATTATTACGcTTTg        | 6.69  | -45  |
| LM                                                    | <i>adcA-adcC-adcB</i> (lmo0153-5)                  | cAAATaagAATTATTACGtTTTg        | 6.01  | -98  |
|                                                       | <i>adcC2-adcB2-zur</i> ( <i>zurAMR</i> )           | tAAATCGaAgTaATTACGATTTA        | 5.75  | -88  |
|                                                       | <i>S14p</i> (lmo1882)                              | TAAATCGgAATGATTAttATTTA        | 6.57  | -38  |
| LI                                                    | <i>adcA-adcC-adcB</i> (lin0193-1)                  | cAAATaagAATGATTACGtTTTA        | 6.22  | -98  |
|                                                       | <i>adcC2-adcB2-zur</i> ( <i>zurAMR</i> )           | TAAATCGaAgTaATTACGATTTA        | 5.75  | -88  |
|                                                       | <i>S14p</i> (lin195)                               | TAAATCGgAATGATTAttATTTA        | 6.57  | -37  |
| SA                                                    | <u><i>adcA</i></u> (SAV2390)                       | <u>TAAAaCGTAAaGATTACtATTTA</u> | 6.43  | -33  |
|                                                       | <u><i>yciC</i></u> (SAV0438)                       | <u>TAAAaCGgAATTATTcCtATTTA</u> | 6.50  | -51  |
|                                                       | <i>S14p</i> (SAV1320)                              | TAAATCGTAATAATTACGATTTg        | 7.01  | -46  |
|                                                       | <i>adcC-adcB-zur</i> (SAV1545-3)                   | TgAgTCGTAAaCATTActgTTTA        | 4.99  | -68  |
| EF                                                    | <i>adcA-adcC-adcB</i>                              | cAAATCGTAAaTATTACGgTTTA        | 6.16  | -50  |
|                                                       | <i>zur</i>                                         | TAAATCagAATCATTACGAaTA         | 6.00  | -79  |
|                                                       | <i>S14p-L33p4-yciC</i>                             | cAAATCGTAAcCATTACGATTTA        | 6.70  | -52  |

Positions (column 4) are given with respect to the translation start sites of the first gene in an operon. The training set is underlined. Known sites are marked by asterisks (\*). Genes forming candidate operons are separated by dashes (-). Operons transcribed in opposite directions (divergons) are separated by less

than/greater than signs (</>). pZUR and nZUR, ZUR proteins from Gram-positive and -negative bacteria, respectively.
