# Supplementary material
Source: PubMed Central journal article supplement (PMC187884)
Supplement: pnas_100_17_9912__2.pdf [file pnas_100_17_9912__2.pdf]

**Table 3. Candidate AdcR-binding sites in the *Streptococcus* group [two additional genomes are *Streptococcus agalactiae* (AG) and *Streptococcus equi* (EQ)]**

| Genome               | Genes and operons                                | Site                                   | Score | Position |
|----------------------|--------------------------------------------------|----------------------------------------|-------|----------|
| PN                   | <u><i>adcR-adcC-adcB-adcA</i></u> (SP2172-69) ** | TTAACTGGT <sub>a</sub> AA              | 5.10  | -75      |
|                      | <i>lmb-phpD</i> (SP1002-3)                       | TTtACTAGTTAA                           | 5.10  | -35      |
|                      |                                                  | TTAA <sub>a</sub> TGGTTAA              | 4.73  | -23      |
|                      | <i>phpE</i> (SP1004)                             | TTtACTGGTTAA                           | 5.10  | -103     |
|                      |                                                  | TTAA <sub>a</sub> TGGTTAA              | 4.73  | -91      |
|                      | <i>phpB</i> (SP1774)                             | TTAACTAGTTAA                           | 5.42  | -66      |
|                      |                                                  | TTAACCGGTT <sub>t</sub> A              | 4.73  | -54      |
| <i>phpA</i> (SP1775) | TTAAC <sub>C</sub> AGTTAA                        | 5.42                                   | -123  |          |
| PY                   | <u><i>adcR-adcC-adcB</i></u>                     | TTAACTGGTTAA                           | 5.42  | -28      |
|                      | <u><i>adcA</i></u> (SpyM18_0781)                 | TTAAC <sub>C</sub> AGTTAA              | 5.42  | -29      |
|                      |                                                  | TTAACTGGT <sub>c</sub> AA              | 4.99  | -44      |
|                      | <i>lmb-phpD</i> (SpyM18_2073-2)                  | TTAACTGGTTAA                           | 5.86  | -42      |
|                      |                                                  | aTTAACTGGTTAA                          | 4.73  | -31      |
|                      | <i>phtY</i> (SPY1361)                            | TTAACTAGTTAA                           | 5.42  | -28      |
|                      | <i>S14p</i> (rs14)                               | TTAAC <sub>C</sub> AGTTAA              | 5.42  | -83      |
| aTTAACTAGTTAA        |                                                  | 4.73                                   | -146  |          |
| MU                   | <i>adcR-adcC-adcB</i>                            | TTAACTGGTTAA                           | 5.42  | -49      |
|                      |                                                  | TTAAC <sub>C</sub> AGTTAA              | 5.42  | -25      |
|                      | <i>adcA</i>                                      | TTAAC <sub>C</sub> AGT <sub>a</sub> AA | 5.10  | -40      |
| AG                   | <i>lmb-phpD</i>                                  | TTAACTGGTTAA                           | 5.42  | -44      |
|                      |                                                  | aTTAACTGGTTAA                          | 4.73  | -33      |
| EQ                   | <i>lmb-phpD</i>                                  | TTAACCGGTT <sub>c</sub> A              | 4.73  | -39      |
|                      |                                                  | aTTAACTGGTTAA                          | 4.73  | -28      |
| LL                   | <i>adcR-adcA-adcC-adcB</i> (zitRSQP)             | TTAAC <sub>C</sub> AGT <sub>a</sub> AA | 5.10  | -34      |
|                      |                                                  | TTAACTGGTT <sub>g</sub> A              | 4.73  | -70      |
|                      | <i>S14p</i> (rpsN2)                              | TTAACTGGTTAA                           | 5.42  | -41      |
|                      |                                                  | TTAACTGGTT <sub>g</sub> A              | 4.73  | -77      |

Gene previously proposed to be under the AdcR regulation [4] is marked by two asterisks (\*\*). Other notations are as described for Table 2. The consensus is TTAACYRGTTAA.
